# Supplementary material for: Purification, organophilicity and transparent fluorescent bulk material fabrication derived from hydrophilic carbon dots
Source: Royal Society of Chemistry journal article supplement (doi:10.1039/c4ra15684f), 2015-01-01
Supplement: c4ra15684f1.pdf [file c4ra15684f1.pdf]

Electronic Supplementary Information

# Purification, organophilicity and transparent fluorescent film fabrication derived from hydrophilic carbon dots

Xiangyang Chen<sup>a,b</sup>, Zhijun zhang<sup>c\*</sup>, Jingtai Zhao<sup>c\*</sup>

<sup>a</sup>Key Laboratory of Transparent Opto-Functional Inorganic Materials of Chinese Academy of Sciences, Shanghai Institute of Ceramics, Shanghai 200050, PR China

<sup>b</sup>University of Chinese Academy of Sciences, Beijing 100039, PR China

<sup>c</sup>School of Materials Science and Engineering, Shanghai University, Shanghai 200072, PR China

## 1. Experimental details

### Materials

Methyl Methacrylate (MMA) and benzoyl peroxide (BPO) were purchased from Aladdin-reagent Ltd (Shanghai, China) and used as received without further treatment. Reagent-grade ammonium bicarbonate, trisodium citrate dehydrate, ethanol, hexamethylene, and toluene were supplied by Sinopharm Chemical Reagent Co., Ltd. (Shanghai, China). High-purity water with the resistivity of greater than  $18 \text{ M} \cdot \text{cm}^{-1}$  was used in the experiments.

### Synthesis

*Synthesis of hydrophilic CDs (first process in Scheme S1):* The prepared route is similar to the previous report<sup>1</sup> with a modification. Typically, 0.4 g ammonium bicarbonate, 3.0 g  $\text{NH}_4\text{HCO}_3$  and 20 ml high-purity water were sealed into a 100 ml Teflon equipped stainless steel autoclave followed by hydrothermal reaction at  $180 \text{ }^\circ\text{C}$  for 4 h. The resultant showed a transparent yellow color, which can be assigned to the ultra-small size of CDs with little light scattering.

*Procedures of CDs purification (second process in Scheme S1):* In a typical process, 3 ml hexamethylene was added to the CDs solution (10 ml) with magnetic stirring for about 10 min. Then 1 ml ethanol was added dropwise as an inducer to the interface at a low rate via syringe<sup>2</sup>, and the CDs in water were trapped at the interface. As a result, the highly enriched CDs in the interface was obtained.

*Synthesis of organophilic ODA-CDs (third process in Scheme S1):* 5 ml as-purified hydrophilic CDs was dispersed in 15 ml distilled water and the pH was tuned to 5~7 with acetic acid. 20 ml toluene and 0.1 g octadecylamine (as surfactant) were added to the solution. The mixed suspension was then transferred to a 100 ml Teflon-lined autoclave and heated at  $160 \text{ }^\circ\text{C}$  for 4 h. After cooling, upper solution was removed and then centrifuged 3 times with distilled water.

*Fabrication of PMMA/ODA-CDs transparent fluorescent bulk (last process in Scheme S1):* 1.5 ml organophilic ODA-CDs was dried in oven for about 10 min, then 10 ml methyl methacrylate monomer (MMA) and 0.01 g benzoyl peroxide were added. The as-fabricated samples was processed into 2D self-supporting films.

### Characterization

*Transmission electron microscopy (TEM):* The particle diameter was examined with a JEOL JEM-2100 transmission electron microscope with 200 kV. A drop of corresponding carbon dot aqueous solution was placed on a copper grid that was left to dry before transferring into the TEM sample chamber.

*Spectroscopy:* The absorption spectra were measured with a Hitachi U-3010 spectrophotometer in the wavelength region of 200-800 nm. UV excitation and emission spectra were carried out at Hitachi F-4600 spectrometer. The scan speed was fixed at 240 nm/min, the voltage was 700 V and the slits were fixed at 2.5 nm. The room temperature

---

\* E-mail: zhangzhijun@shu.edu.cn (Z. J. Zhang), jtzhao@shu.edu.cn (J. T. Zhao).

PL QYs of CDs were calculated by the integrated emission of the CDs samples in solution compared with that of rhodamine 6G with a PL QY of 95% in ethanol with identical optical density<sup>3</sup>. XPS spectra of the samples on a Si (100) substrate were measured on EscaLab 250Xi X-ray Photoelectron Spectroscopy. The transient decays were recorded on an Edinburgh Instruments (FLS 980) spectrofluorimeter equipped with both continuous (450 W) and pulsed xenon lamps.

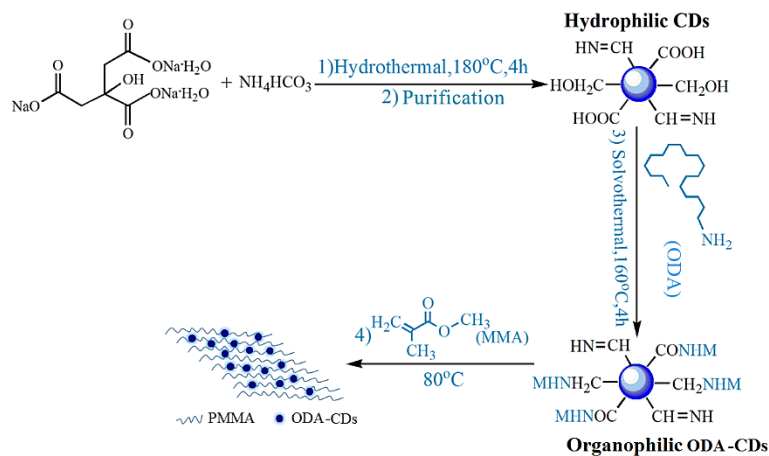

**Scheme S1** Schematic procedures of (1) synthesis, (2) purification, (3) hydrophobization, (4) solification, namely fabrication of PMMA/ODA-CDs hybrid composite.

## 2. Results section

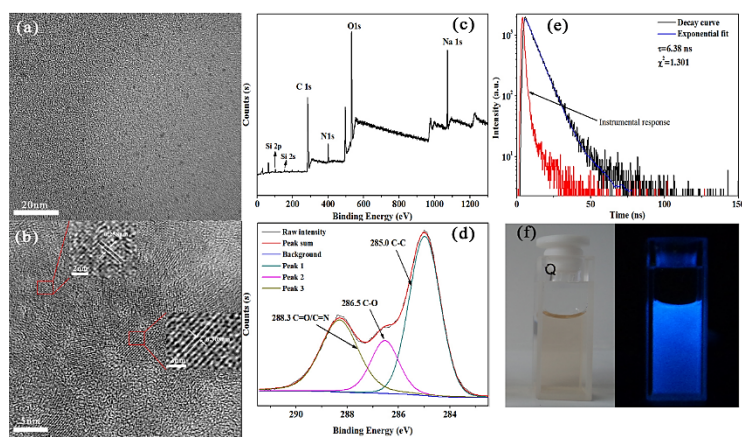

**Fig. S1** (a) TEM and (b) HRTEM images of as-prepared hydrothermal-derived CDs, (c) XPS spectra of the CDs and (d) the corresponding high-resolution spectra of the C 1s peak, (e) fluorescence decay curve and (f) digital photos of the CDs under ambient and 365 nm UV light.

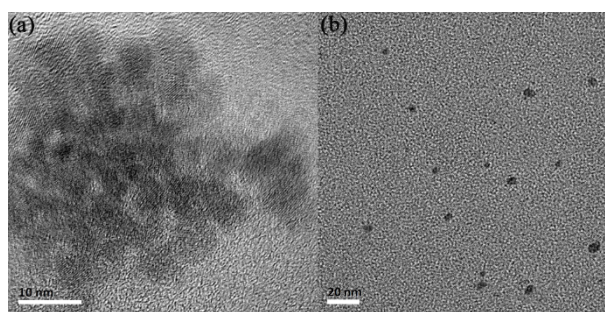

**Fig. S2** TEM images of CDs: the enriched ones in the interface through oil/water interfacial self-assembly strategy (a), and then diluted by water (b).

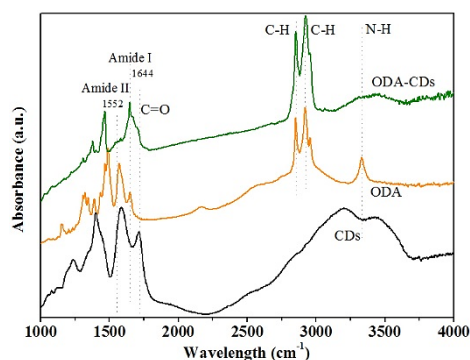

**Fig. S3** FTIR spectra of CDs, octadecylamine (ODA), and octadecylamine-CDs (ODA-CDs)

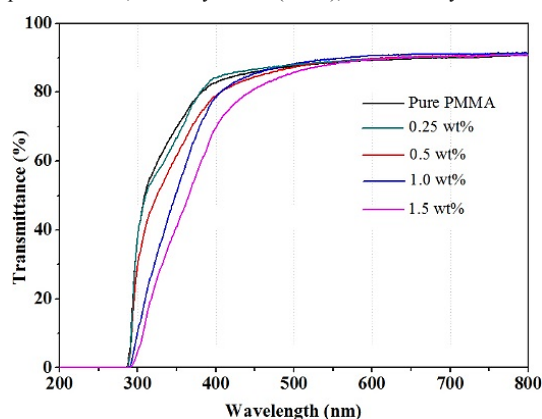

**Fig. S4** The transparence of the as-prepared fluorescent bulks from CDs purified by dialysis method.

**Table S1** Element contents of original, interfacial and dialytic CDs.

|           | C1s (mol%) | O1s   | N1s  | Na1s  | Si2p |
|-----------|------------|-------|------|-------|------|
| stoste    | 49.49      | 32.46 | 3.06 | 14.27 | 0.71 |
| interface | 66.98      | 25.08 | 1.82 | 5.94  | 0.18 |
| dialysis  | 58.04      | 27.27 | 5.91 | 7.02  | 1.75 |

**Table S2** Bonding variation of C element at different stages.

|           | Integral Area (C-C) (a. u.) | Integral Area (C-O) | Integral Area (C=O/C=N) | Integral Area (CO <sub>3</sub> <sup>2-</sup> ) |
|-----------|-----------------------------|---------------------|-------------------------|------------------------------------------------|
| stoste    | 22512 (42.3%)               | 10523 (19.8%)       | 14386 (27.1%)           | 5742 (10.8%)                                   |
| interface | 56679 (57.3%)               | 20534 (20.8%)       | 21732 (22.0%)           | -                                              |
| dialysis  | 34012 (51.6%)               | 11154 (16.9%)       | 20810 (31.5%)           | -                                              |

### 3. Reference

- 1 Y. M. Guo, Z. Wang, H. W. Shao and X. Y. Jiang, *Carbon*, 2013, **52**, 583-589.
- 2 Y. Ren, M. Chen, L. F. Hu, X. S. Fang and L. M. Wu, *J. Mater. Chem.*, 2012, **22**, 944-950.
